# Supplementary material
Source: publisher figshare collection journal article supplement (https://tandf.figshare.com/ndownloader/files/15086705)
Supplement: Supplementary file 1 [file 15086705]

Supplementary data

Table 1. Model parameters describing the uptake, metabolisation and compartmental distribution of dietary ethoxyquin in Atlantic salmon (Salmo salar). See main text figure 1 for definition of model parameters. After back-transformation (inverse log = exponential)

| model parameters | Fabs | β(t),γ (t),b (t) | δ(t), d(t) | ε(t) | c(t) | EQDM initial fat |
| --- | --- | --- | --- | --- | --- | --- |
| Estimated | 0,071 | 2,798 | 0,828 | 0,031 | 0,023 | 0,345 |
| lower 95% confidence interval | 0,061 | 2,704 | 0,784 | 0,011 | 0,005 | 0,315 |
| higher 95% confidence interval | 0,083 | 2,894 | 0,874 | 0,083 | 0,108 | 0,377 |
